# Supplementary material for: Prepandemic levels of cytokines and immunoglobulins and risk of SARS-CoV-2 infection and COVID-19 in the general population of Barcelona
Source: Research Square preprint supplement (doi:10.21203/rs.3.rs-5117251/v1), 2024-10-24
Supplement: Supplementary file 2 [file f658f8cb9ba3840423684bba.docx]

**Table 1.** Effect of individual cytokine levels measured in 2016-17

on the risk of SARS-CoV-2 seropositivity in 2020-21 (N=145)*

| **Cytokine** | **ORa** | **(IC 95%)** | | **Pb** |  |
| --- | --- | --- | --- | --- | --- |
| **Growth factors** |  |  |  |  |  |
| **G-CSF** |  |  |  |  |  |
| T1 | 1.00 |  |  | 0.515 |  |
| T2 | 0.59 | (0.24 | -1.48) |  |  |
| T3 | 0.73 | (0.30 | -1.76) |  |  |
|  |  |  |  |  |  |
| T1 | 1.00 |  |  | 0.278 |  |
| T2+T3 | 0.66 | (0.31 | -1.40) |  |  |
|  |  |  |  |  |  |
| continuousc | 0.65 | (0.39 | -1.09) | 0.104 |  |
|  |  |  |  |  |  |
| **EGF**d |  |  |  |  |  |
| T1 | 1.00 |  |  | 0.595 |  |
| T2 | 1.25 | (0.49 | -3.24) | 0.309 | e |
| T3 | 1.62 | (0.64 | -4.13) |  |  |
|  |  |  |  |  |  |
| continuousc | 1.58 | (0.80 | -3.11) | 0.187 |  |
|  |  |  |  |  |  |
| **FGF** |  |  |  |  |  |
| T1 | 1.00 |  |  | 0.651 |  |
| T2 | 0.65 | (0.26 | -1.65) |  |  |
| T3 | 0.90 | (0.37 | -2.15) |  |  |
|  |  |  |  |  |  |
| **GM-CSF** |  |  |  |  |  |
| T1 | 1.00 |  |  | 0.860 |  |
| T2 | 1.27 | (0.52 | -3.07) |  |  |
| T3 | 1.21 | (0.48 | -3.02) |  |  |
|  |  |  |  |  |  |
| T1 | 1.00 |  |  | 0.590 |  |
| T2+T3 | 1.24 | (0.57 | -2.70) |  |  |
|  |  |  |  |  |  |
| **HGF** |  |  |  |  |  |
| T1 | 1.00 |  |  | 0.270 |  |
| T2 | 2.11 | (0.85 | -5.23) |  |  |
| T3 | 1.43 | (0.54 | -3.80) |  |  |
|  |  |  |  |  |  |
| **VEGF** |  |  |  |  |  |
| T1 | 1.00 |  |  | 0.589 |  |
| T2 | 1.51 | (0.62 | -3.69) |  |  |
| T3 | 1.01 | (0.39 | -2.61) |  |  |
|  |  |  |  |  |  |

[ continued ]

**Table 1.** Continued.

| **Cytokine** | **ORa** | **(IC 95%)** | | **Pb** |  |
| --- | --- | --- | --- | --- | --- |
| **Chemokines** |  |  |  |  |  |
| **IL-8**d |  |  |  |  |  |
| T1 | 1.00 |  |  | **0.028** |  |
| T2 | 1.43 | (0.59 | -3.45) |  |  |
| T3 | **0.36** | (0.13 | -0.99) |  |  |
|  |  |  |  |  |  |
| T1+T2 | 1.00 |  |  | **0.011** |  |
| T3 | **0.30** | (0.12 | -0.76) |  |  |
|  |  |  |  |  |  |
| continuousc | **0.17** | (0.04 | -0.75) | **0.019** |  |
|  |  |  |  |  |  |
| **IP-10** |  |  |  |  |  |
| T1 | 1.00 |  |  | 0.564 |  |
| T2 | 1.15 | (0.49 | -2.68) |  |  |
| T3 | 0.69 | (0.26 | -1.80) |  |  |
|  |  |  |  |  |  |
| **RANTES**d |  |  |  |  |  |
| T1 | 1.00 |  |  | 0.390 |  |
| T2 | 0.54 | (0.19 | -1.51) |  |  |
| T3 | 0.63 | (0.27 | -1.48) |  |  |
|  |  |  |  |  |  |
| T1 | 1.00 |  |  | 0.178 |  |
| T2+T3 | 0.59 | (0.28 | -1.27) |  |  |
|  |  |  |  |  |  |
| **EOTAXIN** |  |  |  |  |  |
| T1 | 1.00 |  |  | 0.805 |  |
| T2 | 1.37 | (0.54 | -3.47) |  |  |
| T3 | 1.19 | (0.49 | -2.91) |  |  |
|  |  |  |  |  |  |
| **MIP-1α**d |  |  |  |  |  |
| T1 | 1.00 |  |  | 0.069 |  |
| T2 | 0.96 | (0.35 | -2.61) |  |  |
| T3 | 2.46 | (0.99 | -6.15) |  |  |
|  |  |  |  |  |  |
| T1+T2 | 1.00 |  |  | **0.021** |  |
| T3 | **2.52** | (1.15 | -5.50) |  |  |
|  |  |  |  |  |  |
| continuousc | 1.61 | (0.96 | -2.71) | 0.071 |  |
|  |  |  |  |  |  |
| **MIP-1β** |  |  |  |  |  |
| T1 | 1.00 |  |  | 0.380 |  |
| T2 | 1.43 | (0.56 | -3.63) | 0.164 | e |
| T3 | 1.95 | (0.76 | -4.99) |  |  |
|  |  |  |  |  |  |
| T1 | 1.00 |  |  | 0.234 |  |
| T2+T3 | 1.66 | (0.72 | -3.80) |  |  |
|  |  |  |  |  |  |
| continuousc | 1.69 | (0.90 | -3.19) | 0.102 |  |
|  |  |  |  |  |  |
| **MCP-1**d |  |  |  |  |  |
| T1 | 1.00 |  |  | 0.107 |  |
| T2 | 0.40 | (0.15 | -1.10) |  |  |
| T3 | 1.16 | (0.48 | -2.78) |  |  |
|  |  |  |  |  |  |
| continuousc | 2.22 | (0.47 | -10.62) | 0.316 |  |
|  |  |  |  |  |  |
| **MIG**d |  |  |  |  |  |
| Not quantified | 1.00 |  |  | 0.520 |  |
| Quantified | 1.29 | (0.60 | -2.78) |  |  |
|  |  |  |  |  |  |

[ continued ]

**Table 1.** Continued.

| **Cytokine** | **ORa** | **(IC 95%)** | | **Pb** |  |
| --- | --- | --- | --- | --- | --- |
| **TH1** |  |  |  |  |  |
| **IL-2**d |  |  |  |  |  |
| T1 | 1.00 |  |  | 0.286 |  |
| T2 | 1.06 | (0.41 | -2.74) | 0.160 | e |
| T3 | 1.95 | (0.76 | -5.03) |  |  |
|  |  |  |  |  |  |
| T1+T2 | 1.00 |  |  | 0.114 |  |
| T3 | 1.90 | (0.86 | -4.19) |  |  |
|  |  |  |  |  |  |
| continuousc | 1.33 | (0.91 | -1.94) | 0.139 |  |
|  |  |  |  |  |  |
| **IL-12**d |  |  |  |  |  |
| T1 | 1.00 |  |  | 0.730 |  |
| T2 | 1.01 | (0.40 | -2.56) | 0.387 | e |
| T3 | 1.38 | (0.55 | -3.49) |  |  |
|  |  |  |  |  |  |
| **IFN-γ**d |  |  |  |  |  |
| Not quantified | 1.00 |  |  | 0.458 |  |
| Quantified | 1.47 | (0.53 | -4.10) |  |  |
|  |  |  |  |  |  |
| **TH2** |  |  |  |  |  |
| **IL-4** |  |  |  |  |  |
| Not quantified | 1.00 |  |  | 0.659 |  |
| Quantified | 1.20 | (0.54 | -2.68) |  |  |
|  |  |  |  |  |  |
| **IL-5**d |  |  |  |  |  |
| Q1+Q2f | 1.00 |  |  | 0.245 |  |
| Q3 | 1.27 | (0.49 | -3.28) | 0.103 | e |
| Q4 | 2.22 | (0.87 | -5.65) |  |  |
|  |  |  |  |  |  |
| ≤Q3 | 1.00 |  |  | 0.107 |  |
| Q4 | 2.06 | (0.86 | -4.97) |  |  |
|  |  |  |  |  |  |
| continuousc | 1.47 | (0.66 | -3.28) | 0.351 |  |
|  |  |  |  |  |  |
| **IL-13**d |  |  |  |  |  |
| T1 | 1.00 |  |  | 0.673 |  |
| T2 | 1.35 | (0.52 | -3.48) | 0.367 | e |
| T3 | 1.50 | (0.60 | -3.74) |  |  |
|  |  |  |  |  |  |
| continuousc | 1.25 | (0.74 | -2.11) | 0.411 |  |
|  |  |  |  |  |  |
| **Pro-inflammatory** |  |  |  |  |  |
| **IL-1β**d |  |  |  |  |  |
| T1 | 1.00 |  |  | 0.782 |  |
| T2 | 0.88 | (0.35 | -2.20) |  |  |
| T3 | 1.23 | (0.49 | -3.05) |  |  |
|  |  |  |  |  |  |
| **TNF-α** |  |  |  |  |  |
| T1 | 1.00 |  |  | 0.183 |  |
| T2 | 0.49 | (0.20 | -1.20) |  |  |
| T3 | 0.48 | (0.19 | -1.19) |  |  |
|  |  |  |  |  |  |
| T1 | 1.00 |  |  | 0.065 |  |
| T2+T3 | 0.48 | (0.22 | -1.05) |  |  |
|  |  |  |  |  |  |
| continuousc | **0.59** | (0.35 | -0.98) | **0.042** |  |
|  |  |  |  |  |  |

[ continued ]

**Table 1.** Continued.

| **Cytokine** | **ORa** | **(IC 95%)** | | **Pb** |  |
| --- | --- | --- | --- | --- | --- |
|  |  |  |  |  |  |
| **IL-6** |  |  |  |  |  |
| T1 | 1.00 |  |  | 0.948 |  |
| T2 | 0.98 | (0.39 | -2.45) |  |  |
| T3 | 0.87 | (0.36 | -2.09) |  |  |
|  |  |  |  |  |  |
| **IFN-α**d |  |  |  |  |  |
| T1 | 1.00 |  |  | 0.290 |  |
| T2 | 0.95 | (0.37 | -2.46) |  |  |
| T3 | 1.86 | (0.74 | -4.68) |  |  |
|  |  |  |  |  |  |
| **IL-2R** |  |  |  |  |  |
| T1 | 1.00 |  |  | 0.663 |  |
| T2 | 0.86 | (0.35 | -2.10) | 0.368 | e |
| T3 | 0.66 | (0.27 | -1.63) |  |  |
|  |  |  |  |  |  |
| **IL-17**d |  |  |  |  |  |
| Not quantified | 1.00 |  |  | 0.115 |  |
| Quantified | 1.88 | (0.86 | -4.10) |  |  |
|  |  |  |  |  |  |
| **Regulatory** |  |  |  |  |  |
| **IL-7** |  |  |  |  |  |
| T1 | 1.00 |  |  | 0.722 |  |
| T2 | 0.80 | (0.32 | -1.99) |  |  |
| T3 | 0.69 | (0.28 | -1.70) |  |  |
|  |  |  |  |  |  |
| **Anti-inflammatory** |  |  |  |  |  |
| **IL-10**d |  |  |  |  |  |
| Not quantified | 1.00 |  |  | 0.958 |  |
| Quantified | 1.02 | (0.48 | -2.18) |  |  |
|  |  |  |  |  |  |
| **IL-15**d |  |  |  |  |  |
| Not quantified | 1.00 |  |  | 0.118 |  |
| Quantified | 1.90 | (0.85 | -4.27) |  |  |
|  |  |  |  |  |  |
| **IL-1RA**d |  |  |  |  |  |
| T1 | 1.00 |  |  | 0.626 |  |
| T2 | 0.80 | (0.31 | -2.08) |  |  |
| T3 | 1.27 | (0.52 | -3.09) |  |  |
|  |  |  |  |  |  |
| continuousc | 1.18 | (0.48 | -2.90) | 0.722 |  |
|  |  |  |  |  |  |

* The odds ratios quantify the magnitude of the associations between the exposures and SARS-CoV-2 seropositivity in the 41 SARS-CoV-2 seropositives and the 104 seronegatives.

T1 to T3: tertiles. Q1 to Q4: quartiles.

For categorical values of cytokines, ORs shown in bold are ORs ≥2.5 or ORs ≤0.4 with *p* values <0.05.

For continuous values of cytokines, ORs are shown in bold if their *p* values <0.05.

a Unless otherwise specified, odds ratios were adjusted for household outdoor index.

b Unless otherwise specified, *p*‑value derived from Wald’s test.

c Odds ratio for each increase of 10 times in the level of the cytokine. We present just some examples of statistically nonsignificant continuous variables; all other continuous variables not shown in the Table were statistically nonsignificant.

d Odds ratios were further adjusted for smoking.

e Multivariate analogue of Mantel’s extension test for linear trend.

f The category is exclusively made up of individuals whose cytokine level was less than the respective lower limit of quantification (see Methods, section 2.3).

Cytokines IL-5, IL-15, and IL-17 will show associations with seropositivity in multivariate mixture models. It is thus worth noting that in Table 1 above they have odds ratios for seropositivity near 2, not statistically significantly, in their respective dichotomous forms (Q4 vs. ≤Q3 for IL-5, and quantified vs. not quantified for IL-15 and IL-17).

Tables 1 and 6 are the only parts of the article in which all 30 cytokines appear, thus including cytokines that are not associated with the respective outcomes, SARS-CoV-2 seropositivity and COVID-19.

**Table 2.** Influence of mixtures of cytokines on the risk of SARS-CoV-2 seropositivity (N = 145)*

| **Model** | | **ORa** | **(95% CI)** | | **Pb** | **Model** | **ORa** | **(95% CI)** | | **Pb** |  |
| --- | --- | --- | --- | --- | --- | --- | --- | --- | --- | --- | --- |
| **1a** | **IL-8** |  |  |  |  | **1b** |  |  |  |  |  |
|  | T1+T2 | 1.00 |  |  | 0.016 |  | 1.00 |  |  | 0.019 |  |
|  | T3 | 0.31 | (0.12 | -0.80) |  |  | 0.32 | (0.12 | -0.83) |  |  |
|  |  |  |  |  |  |  |  |  |  |  |  |
|  | **IP-10** |  |  |  |  |  |  |  |  |  |  |
|  | T1+T2 | 1.00 |  |  | 0.092 |  | 1.00 |  |  | 0.064 |  |
|  | T3 | 0.41 | (0.15 | -1.16) |  |  | 0.38 | (0.13 | -1.06) |  |  |
|  |  |  |  |  |  |  |  |  |  |  |  |
|  | **MIP-1α** |  |  |  |  |  |  |  |  |  |  |
|  | T1+T2 | 1.00 |  |  | 0.024 |  | 1.00 |  |  | 0.011 |  |
|  | T3 | 2.87 | (1.15 | -7.19) |  |  | 3.50 | (1.34 | -9.17) |  |  |
|  |  |  |  |  |  |  |  |  |  |  |  |
|  | **G-CSF** |  |  |  |  |  |  |  |  |  |  |
|  | T1 | ‒ |  |  |  |  | 1.00 |  |  | 0.026 |  |
|  | T2+T3 |  |  |  |  |  | 0.33 | (0.12 | -0.87) |  |  |
|  |  |  |  |  |  |  |  |  |  |  |  |
|  | **TNF-α** |  |  |  |  |  |  |  |  |  |  |
|  | T1 | 1.00 |  |  | 0.022 |  | ‒ |  |  |  |  |
|  | T2+T3 | 0.35 | (0.15 | -0.86) |  |  |  |  |  |  |  |
|  |  |  |  |  |  |  |  |  |  |  |  |
|  | **IL-17** |  |  |  |  |  |  |  |  |  |  |
|  | Not quantified | 1.00 |  |  | 0.103 |  | 1.00 |  |  | 0.063 |  |
|  | Quantified | 2.21 | (0.85 | -5.71) |  |  | 2.60 | (0.95 | -7.13) |  |  |
|  |  |  |  |  |  |  |  |  |  |  |  |
| **2ac** | **IL-8** |  |  |  |  | **2b** |  |  |  |  |  |
|  | T1+T2 | 1.00 |  |  | 0.015 |  | 1.00 |  |  | 0.015 |  |
|  | T3 | 0.30 | (0.12 | -0.79) |  |  | 0.31 | (0.12 | -0.80) |  |  |
|  |  |  |  |  |  |  |  |  |  |  |  |
|  | **MIP-1α** |  |  |  |  |  |  |  |  |  |  |
|  | T1+T2 | 1.00 |  |  | 0.014 |  | 1.00 |  |  | 0.008 |  |
|  | T3 | 3.10 | (1.25 | -7.67) |  |  | 3.30 | (1.37 | -7.95) |  |  |
|  |  |  |  |  |  |  |  |  |  |  |  |
|  | **G-CSF** |  |  |  |  |  |  |  |  |  |  |
|  | T1 | 1.00 |  |  | 0.055 |  | 1.00 |  |  | 0.071 |  |
|  | T2+T3 | 0.40 | (0.16 | -1.02) |  |  | 0.45 | (0.19 | -1.07) |  |  |
|  |  |  |  |  |  |  |  |  |  |  |  |
|  | **IL-5** |  |  |  |  |  |  |  |  |  |  |
|  | ≤Q3 | 1.00 |  |  | 0.125 |  | ‒ |  |  |  |  |
|  | Q4 | 2.17 | (0.81 | -5.84) |  |  |  |  |  |  |  |
|  |  |  |  |  |  |  |  |  |  |  |  |
| **3a** | **IL-8** |  |  |  |  | **3b** |  |  |  |  |  |
|  | T1+T2 | 1.00 |  |  | 0.015 |  | 1.00 |  |  | 0.012 |  |
|  | T3 | 0.31 | (0.12 | -0.80) |  |  | 0.30 | (0.12 | -0.77) |  |  |
|  |  |  |  |  |  |  |  |  |  |  |  |
|  | **MIP-1α** |  |  |  |  |  |  |  |  |  |  |
|  | T1+T2 | ‒ |  |  |  |  | 1.00 |  |  | 0.011 |  |
|  | T3 |  |  |  |  |  | 2.93 | (1.28 | -6.71) |  |  |
|  |  |  |  |  |  |  |  |  |  |  |  |
|  | **TNF-α** |  |  |  |  |  |  |  |  |  |  |
|  | T1 | 1.00 |  |  | 0.035 |  | 1.00 |  |  | 0.032 |  |
|  | T2+T3 | 0.41 | (0.18 | -0.94) |  |  | 0.40 | (0.17 | -0.93) |  |  |
|  | **IL-15** |  |  |  |  |  |  |  |  |  |  |
|  | Not quantified | 1.00 |  |  | 0.063 |  | ‒ |  |  |  |  |
|  | Quantified | 2.26 | (0.96 | -5.34) |  |  |  |  |  |  |  |
|  |  |  |  |  |  |  |  |  |  |  |  |

[ continued ]

**Table 2.** Continued.

| **Model** | | **ORa** | **(95% CI)** | | **Pb** | **Model** | **ORa** | **(95% CI)** | | **Pb** |  |
| --- | --- | --- | --- | --- | --- | --- | --- | --- | --- | --- | --- |
| **4a** | **IP-10** |  |  |  |  | **4b** |  |  |  |  |  |
|  | T1+T2 | 1.00 |  |  | 0.091 |  | 1.00 |  |  | 0.162 |  |
|  | T3 | 0.43 | (0.16 | -1.15) |  |  | 0.51 | (0.20 | -1.31) |  |  |
|  |  |  |  |  |  |  |  |  |  |  |  |
|  | **TNF-α** |  |  |  |  |  |  |  |  |  |  |
|  | T1 | 1.00 |  |  | 0.017 |  | 1.00 |  |  | 0.027 |  |
|  | T2+T3 | 0.35 | (0.15 | -0.83) |  |  | 0.39 | (0.17 | -0.90) |  |  |
|  |  |  |  |  |  |  |  |  |  |  |  |
|  | **IL-17** |  |  |  |  |  |  |  |  |  |  |
|  | Not quantified | 1.00 |  |  | 0.061 |  | ‒ |  |  |  |  |
|  | Quantified | 2.41 | (0.96 | -6.01) |  |  |  |  |  |  |  |
|  |  |  |  |  |  |  |  |  |  |  |  |
|  | **IL-15** |  |  |  |  |  |  |  |  |  |  |
|  | Not quantified | 1.00 |  |  | 0.097 |  | 1.00 |  |  | 0.065 |  |
|  | Quantified | 2.18 | (0.87 | -5.46) |  |  | 2.34 | (0.95 | -5.79) |  |  |
|  |  |  |  |  |  |  |  |  |  |  |  |
|  | **IL-5** |  |  |  |  |  |  |  |  |  |  |
|  | ≤Q3 | ‒ |  |  |  |  | 1.00 |  |  | 0.160 |  |
|  | Q4 |  |  |  |  |  | 1.95 | (0.77 | -4.98) |  |  |
|  |  |  |  |  |  |  |  |  |  |  |  |

* The odds ratios quantify the magnitude of the associations between the cytokines and SARS-CoV-2 seropositivity in the 145 individuals, 41 SARS-CoV-2 seropositives and 104 seronegatives. An OR of 1.00 denotes the reference category.

T1 to T3: tertiles. Q1 to Q4: quartiles.

a Unless otherwise specified, odds ratios of the cytokines were always mutually adjusted for, and further adjusted by household outdoor index.

b Wald’s test (two-tailed).

c Odds ratios of the cytokines were mutually adjusted for, and further adjusted by household outdoor index and smoking (all two confounders p<0.25).

**Table 3.** Effect of selected individual isotype-antigen pairs for cytomegalovirus, Epstein-Barr virus, and common cold infections measured in 2016-17 on the risk of SARS-CoV-2 seropositivity in 2020-21 (N=145)*

| **Isotype-antigen pair** | **ORa** | **(IC 95%)** | | **Pb** |  |
| --- | --- | --- | --- | --- | --- |
|  |  |  |  |  |  |
| **IgA CMV pp150** |  |  |  |  |  |
| T1 | 1.00 |  |  | 0.029 |  |
| T2 | 2.62 | (1.03 | -6.66) |  |  |
| T3 | 0.89 | (0.32 | -2.48) |  |  |
|  |  |  |  |  |  |
| T1+T2 | 1.00 |  |  | 0.098 |  |
| T3 | 0.50 | (0.22 | -1.14) |  |  |
|  |  |  |  |  |  |
| continuousc | 0.58 | (0.18 | -1.88) | 0.366 |  |
|  |  |  |  |  |  |
| **IgA CMV pp65d** |  |  |  |  |  |
| T1 | 1.00 |  |  | 0.618 |  |
| T2 | 0.95 | (0.38 | -2.31) |  |  |
| T3 | 0.65 | (0.25 | -1.65) |  |  |
|  |  |  |  |  |  |
| T1+T2 | 1.00 |  |  | 0.444 |  |
| T3 | 0.73 | (0.33 | -1.62) |  |  |
|  |  |  |  |  |  |
| **IgA EBV EA-D** |  |  |  |  |  |
| T1 | 1.00 |  |  | 0.425 |  |
| T2 | 0.77 | (0.30 | -2.03) |  |  |
| T3 | 1.44 | (0.61 | -3.38) |  |  |
|  |  |  |  |  |  |
| T1+T2 | 1.00 |  |  | 0.226 |  |
| T3 | 1.60 | (0.75 | -3.43) |  |  |
|  |  |  |  |  |  |
| **IgG CMV pp150** |  |  |  |  |  |
| T1 | 1.00 |  |  | 0.102 |  |
| T2 | 0.51 | (0.21 | -1.24) | **0.039** | e |
| T3 | **0.37** | (0.14 | -0.97) |  |  |
|  |  |  |  |  |  |
| T1 | 1.00 |  |  | **0.039** |  |
| T2+T3 | **0.44** | (0.20 | -0.96) |  |  |
|  |  |  |  |  |  |
| continuousc | 0.47 | (0.22 | -1.03) | 0.060 |  |
|  |  |  |  |  |  |
| **IgG CMV pp65** |  |  |  |  |  |
| T1 | 1.00 |  |  | 0.200 |  |
| T2 | 0.48 | (0.19 | -1.19) |  |  |
| T3 | 0.49 | (0.19 | -1.24) |  |  |
|  |  |  |  |  |  |
| T1 | 1.00 |  |  | 0.073 |  |
| T2+T3 | 0.48 | (0.22 | -1.07) |  |  |
|  |  |  |  |  |  |
| continuousc | 0.31 | (0.07 | -1.39) | 0.125 |  |
|  |  |  |  |  |  |
| **IgG EBV VCAp18** |  |  |  |  |  |
| T1 | 1.00 |  |  | 0.251 |  |
| T2 | 0.84 | (0.35 | -2.04) | 0.108 | e |
| T3 | 0.46 | (0.18 | -1.17) |  |  |
|  |  |  |  |  |  |
| T1+T2 | 1.00 |  |  | 0.106 |  |
| T3 | 0.50 | (0.22 | -1.16) |  |  |
|  |  |  |  |  |  |
| continuousc | 0.53 | (0.20 | -1.39) | 0.198 |  |
|  |  |  |  |  |  |
| **IgG N OC43** |  |  |  |  |  |
| T1 | 1.00 |  |  | 0.071 |  |
| T2 | 1.62 | (0.68 | -3.84) |  |  |
| T3 | 0.52 | (0.19 | -1.40) |  |  |
|  |  |  |  |  |  |
| T1+T2 | 1.00 |  |  | **0.045** |  |
| T3 | **0.40** | (0.17 | -0.98) |  |  |
|  |  |  |  |  |  |
| continuousc | 0.38 | (0.13 | -1.13) | 0.082 |  |
|  |  |  |  |  |  |

[ continued ]

**Table 3.** Continued.

| **Isotype-antigen pair** | **ORa** | **(IC 95%)** | | **Pb** |  |
| --- | --- | --- | --- | --- | --- |
|  |  |  |  |  |  |
| **IgM CMV pp65** |  |  |  |  |  |
| T1 | 1.00 |  |  | 0.250 |  |
| T2 | 2.19 | (0.81 | -5.90) |  |  |
| T3 | 2.05 | (0.77 | -5.42) |  |  |
|  |  |  |  |  |  |
| T1 | 1.00 |  |  | 0.097 |  |
| T2+T3 | 2.12 | (0.87 | -5.13) |  |  |
|  |  |  |  |  |  |
| continuousc | 2.74 | (0.72 | -10.42) | 0.140 |  |
|  |  |  |  |  |  |
| **IgM EBV EA-D**d |  |  |  |  |  |
| T1 | 1.00 |  |  | 0.138 |  |
| T2 | 1.04 | (0.38 | -2.83) | 0.078 | e |
| T3 | 2.25 | (0.88 | -5.74) |  |  |
|  |  |  |  |  |  |
| T1+T2 | 1.00 |  |  | **0.047** |  |
| T3 | **2.21** | (1.01 | -4.82) |  |  |
|  |  |  |  |  |  |
| continuousc | 3.07 | (0.60 | -15.81) | 0.181 |  |
|  |  |  |  |  |  |
| **IgM N 229Ed** |  |  |  |  |  |
| T1 | 1.00 |  |  | 0.147 |  |
| T2 | 0.64 | (0.24 | -1.74) |  |  |
| T3 | 1.64 | (0.67 | -4.00) |  |  |
|  |  |  |  |  |  |
| T1+T2 | 1.00 |  |  | 0.074 |  |
| T3 | 2.02 | (0.93 | -4.37) |  |  |
|  |  |  |  |  |  |
| **IgM N HKU1** |  |  |  |  |  |
| T1 | 1.00 |  |  | 0.128 |  |
| T2 | 1.04 | (0.40 | -2.73) |  |  |
| T3 | 2.24 | (0.91 | -5.52) |  |  |
|  |  |  |  |  |  |
| T1+T2 | 1.00 |  |  | **0.043** |  |
| T3 | **2.20** | (1.03 | -4.80) |  |  |
|  |  |  |  |  |  |
| continuousc | 2.65 | (0.66 | -10.73) | 0.172 |  |
|  |  |  |  |  |  |

* This Table shows results for the 11 immunoglobulins most related to SARS-CoV-2 seropositivity; results for the other 13 immunoglobulins are shown in Supplementary Table 1. The odds ratios quantify the magnitude of the associations between the exposures and SARS-CoV-2 seropositivity in the 41 SARS-CoV-2 seropositives and the 104 seronegatives. T1 to T3: tertiles.

For categorical values of immunoglobulins, ORs shown in bold are ORs ≥2.5 or ORs ≤0.4 with *p* values <0.05.

For continuous values of immunoglobulins, ORs are shown in bold if their *p* values <0.05.

a Unless otherwise specified, odds ratios were adjusted for household outdoor index.

b Unless otherwise specified, *p*‑value derived from Wald’s test.

c Odds ratio for each increase of 10 times in the level of the isotype-antigen pair. We present just some examples of statistically nonsignificant continuous variables; all other continuous variables not shown in the Table were statistically nonsignificant.

d Odds ratios adjusted for household outdoor index and smoking.

e Multivariate analogue of Mantel’s extension test for linear trend.

**Table 4.** Influence of mixtures of isotype-antigen pairs for cytomegalovirus, Epstein-Barr virus, and common cold infections on the risk of SARS-CoV-2 seropositivity (N = 145)*

| **Model** | | **ORa** | **(95% CI)** | | **Pb** | **Model** | **ORa** | **(95% CI)** | | **Pb** |  |
| --- | --- | --- | --- | --- | --- | --- | --- | --- | --- | --- | --- |
| **1a** | **IgA CMV pp150** |  |  |  |  | **1b** |  |  |  |  |  |
|  | T1+T2 | 1.00 |  |  | 0.004 |  | 1.00 |  |  | 0.010 |  |
|  | T3 | 0.21 | (0.07 | -0.60) |  |  | 0.27 | (0.10 | -0.73) |  |  |
|  |  |  |  |  |  |  |  |  |  |  |  |
|  | **IgA EBV EA-D** |  |  |  |  |  |  |  |  |  |  |
|  | T1+T2 | 1.00 |  |  | 0.019 |  | 1.00 |  |  | 0.016 |  |
|  | T3 | 3.26 | (1.21 | -8.76) |  |  | 3.27 | (1.24 | -8.58) |  |  |
|  |  |  |  |  |  |  |  |  |  |  |  |
|  | **IgG N OC43** |  |  |  |  |  |  |  |  |  |  |
|  | T1+T2 | 1.00 |  |  | 0.017 |  | 1.00 |  |  | 0.014 |  |
|  | T3 | 0.30 | (0.11 | -0.80) |  |  | 0.30 | (0.11 | -0.78) |  |  |
|  |  |  |  |  |  |  |  |  |  |  |  |
|  | **IgM EBV EA-D** |  |  |  |  |  |  |  |  |  |  |
|  | T1+T2 | 1.00 |  |  | 0.021 |  | ‒ |  |  |  |  |
|  | T3 | 2.75 | (1.16 | -6.52) |  |  |  |  |  |  |  |
|  |  |  |  |  |  |  |  |  |  |  |  |
| **2a** | **IgA CMV pp150** |  |  |  |  | **2b** |  |  |  |  |  |
|  | T1+T2 | 1.00 |  |  | 0.024 |  | 1.00 |  |  | 0.025 |  |
|  | T3 | 0.35 | (0.14 | -0.87) |  |  | 0.36 | (0.15 | -0.88) |  |  |
|  |  |  |  |  |  |  |  |  |  |  |  |
|  | **IgG EBV VCAp18** |  |  |  |  |  |  |  |  |  |  |
|  | T1+T2 | 1.00 |  |  | 0.070 |  | ‒ |  |  |  |  |
|  | T3 | 0.44 | (0.18 | -1.07) |  |  |  |  |  |  |  |
|  |  |  |  |  |  |  |  |  |  |  |  |
|  | **IgG N OC43** |  |  |  |  |  |  |  |  |  |  |
|  | T1+T2 | 1.00 |  |  | 0.044 |  | 1.00 |  |  | 0.044 |  |
|  | T3 | 0.37 | (0.14 | -0.97) |  |  | 0.38 | (0.15 | -0.98) |  |  |
|  |  |  |  |  |  |  |  |  |  |  |  |
|  | **IgM EBV EA-D** |  |  |  |  |  |  |  |  |  |  |
|  | T1+T2 | 1.00 |  |  | 0.012 |  | 1.00 |  |  | 0.018 |  |
|  | T3 | 3.00 | (1.27 | -7.06) |  |  | 2.78 | (1.19 | -6.47) |  |  |
|  |  |  |  |  |  |  |  |  |  |  |  |
| **3a** | **IgA CMV pp150** |  |  |  |  | **3b** |  |  |  |  |  |
|  | T1+T2 | 1.00 |  |  | 0.012 |  | 1.00 |  |  | 0.023 |  |
|  | T3 | 0.27 | (0.10 | -0.75) |  |  | 0.32 | (0.12 | -0.86) |  |  |
|  |  |  |  |  |  |  |  |  |  |  |  |
|  | **IgA CMV pp65** |  |  |  |  |  |  |  |  |  |  |
|  | T1+T2 | 1.00 |  |  | 0.012 |  | 1.00 |  |  | 0.028 |  |
|  | T3 | 0.18 | (0.05 | -0.69) |  |  | 0.25 | (0.07 | -0.86) |  |  |
|  |  |  |  |  |  |  |  |  |  |  |  |
|  | **IgA EBV EA-D** |  |  |  |  |  |  |  |  |  |  |
|  | T1+T2 | 1.00 |  |  | 0.001 |  | 1.00 |  |  | 0.004 |  |
|  | T3 | 10.91 | (2.72 | -43.78) |  |  | 6.36 | (1.79 | -22.61) |  |  |
|  |  |  |  |  |  |  |  |  |  |  |  |
|  | **IgG N OC43** |  |  |  |  |  |  |  |  |  |  |
|  | T1+T2 | 1.00 |  |  | 0.006 |  | ‒ |  |  |  |  |
|  | T3 | 0.24 | (0.09 | -0.66) |  |  |  |  |  |  |  |
|  |  |  |  |  |  |  |  |  |  |  |  |
| **4a** | **IgA CMV pp150** |  |  |  |  | **4b** |  |  |  |  |  |
|  | T1+T2 | 1.00 |  |  | 0.003 |  | 1.00 |  |  | 0.032 |  |
|  | T3 | 0.20 | (0.07 | -0.59) |  |  | 0.38 | (0.16 | -0.92) |  |  |
|  |  |  |  |  |  |  |  |  |  |  |  |
|  | **IgA EBV EA-D** |  |  |  |  |  |  |  |  |  |  |
|  | T1+T2 | 1.00 |  |  | 0.012 |  | ‒ |  |  |  |  |
|  | T3 | 3.61 | (1.32 | -9.86) |  |  |  |  |  |  |  |
|  |  |  |  |  |  |  |  |  |  |  |  |
|  | **IgG N OC43** |  |  |  |  |  |  |  |  |  |  |
|  | T1+T2 | 1.00 |  |  | 0.011 |  | 1.00 |  |  | 0.035 |  |
|  | T3 | 0.28 | (0.10 | -0.75) |  |  | 0.37 | (0.15 | -0.93) |  |  |
|  |  |  |  |  |  |  |  |  |  |  |  |
|  | **IgM CMV pp65** |  |  |  |  |  |  |  |  |  |  |
|  | T1 | 1.00 |  |  | 0.029 |  | 1.00 |  |  | 0.039 |  |
|  | T2+T3 | 3.08 | (1.12 | -8.44) |  |  | 2.77 | (1.05 | -7.34) |  |  |
|  |  |  |  |  |  |  |  |  |  |  |  |

[ continued ]

**Table 4.** Continued.

| **Model** | | **ORa** | **(95% CI)** | | **Pb** | **Model** | **ORa** | **(95% CI)** | | **Pb** |  |
| --- | --- | --- | --- | --- | --- | --- | --- | --- | --- | --- | --- |
| **5ac** | **IgA CMV pp150** |  |  |  |  | **5bc** |  |  |  |  |  |
|  | T1+T2 | 1.00 |  |  | 0.005 |  | 1.00 |  |  | 0.017 |  |
|  | T3 | 0.22 | (0.08 | -0.64) |  |  | 0.30 | (0.11 | -0.80) |  |  |
|  |  |  |  |  |  |  |  |  |  |  |  |
|  | **IgA EBV EA-D** |  |  |  |  |  |  |  |  |  |  |
|  | T1+T2 | 1.00 |  |  | 0.010 |  | 1.00 |  |  | 0.013 |  |
|  | T3 | 3.61 | (1.35 | -9.62) |  |  | 3.37 | (1.30 | -8.77) |  |  |
|  |  |  |  |  |  |  |  |  |  |  |  |
|  | **IgG CMV pp65** |  |  |  |  |  |  |  |  |  |  |
|  | T1 | 1.00 |  |  | 0.019 |  | 1.00 |  |  | 0.031 |  |
|  | T2+T3 | 0.35 | (0.14 | -0.84) |  |  | 0.39 | (0.17 | -0.92) |  |  |
|  |  |  |  |  |  |  |  |  |  |  |  |
|  | **IgM EBV EA-D** |  |  |  |  |  |  |  |  |  |  |
|  | T1+T2 | 1.00 |  |  | 0.015 |  | ‒ |  |  |  |  |
|  | T3 | 2.83 | (1.22 | -6.55) |  |  |  |  |  |  |  |
|  |  |  |  |  |  |  |  |  |  |  |  |
| **6a** | **IgM EBV EA-D** |  |  |  |  | **6b** |  |  |  |  |  |
|  | T1+T2 | 1.00 |  |  | 0.031 |  | 1.00 |  |  | 0.055 |  |
|  | T3 | 2.42 | (1.08 | -5.38) |  |  | 2.18 | (0.99 | -4.81) |  |  |
|  |  |  |  |  |  |  |  |  |  |  |  |
|  | **IgG CMV pp65** |  |  |  |  |  |  |  |  |  |  |
|  | T1 | 1.00 |  |  | 0.050 |  | ‒ |  |  |  |  |
|  | T2+T3 | 0.44 | (0.19 | -1.00) |  |  |  |  |  |  |  |
|  |  |  |  |  |  |  |  |  |  |  |  |
|  | **IgG N OC43** |  |  |  |  |  |  |  |  |  |  |
|  | T1+T2 | – |  |  |  |  | 1.00 |  |  | 0.049 |  |
|  | T3 |  |  |  |  |  | 0.40 | (0.16 | -1.00) |  |  |
|  |  |  |  |  |  |  |  |  |  |  |  |

* The odds ratios (ORs) quantify the magnitude of the associations between the immunoglobulin isotype-antigen pair and SARS-CoV-2 seropositivity in the 145 individuals, 41 SARS-CoV-2 seropositives and 104 seronegatives. An OR of 1.00 denotes the reference category.

T1 to T3: tertiles.

a Unless otherwise specified, odds ratios of the isotype-antigen pair of the immunoglobulins were always mutually adjusted for, and further adjusted by household outdoor index and smoking (both confounders p<0.25).

b Wald’s test (two-tailed).

c Odds ratios of the isotype-antigen pair of the immunoglobulins were mutually adjusted for, and further adjusted by household outdoor index (confounder p<0.25).

**Table 5.** Influence of mixtures of cytokines and immunoglobulins on the risk of SARS-CoV-2 seropositivity (N = 145)*

| **Model** | | **ORa** | **(95% CI)** | | **Pb** | **Model** | **ORa** | **(95% CI)** | | **Pb** |  |
| --- | --- | --- | --- | --- | --- | --- | --- | --- | --- | --- | --- |
| **1a** | **IL-8** |  |  |  |  | **1b** |  |  |  |  |  |
|  | T1+T2 | 1.00 |  |  | 0.004 |  | 1.00 |  |  | 0.007 |  |
|  | T3 | 0.22 | (0.08 | -0.61) |  |  | 0.25 | (0.09 | -0.68) |  |  |
|  |  |  |  |  |  |  |  |  |  |  |  |
|  | **MIP-1α** |  |  |  |  |  |  |  |  |  |  |
|  | T1+T2 | 1.00 |  |  | 0.004 |  | 1.00 |  |  | 0.015 |  |
|  | T3 | 3.72 | (1.51 | -9.14) |  |  | 2.91 | (1.24 | -6.85) |  |  |
|  |  |  |  |  |  |  |  |  |  |  |  |
|  | **IgA CMV pp150** |  |  |  |  |  |  |  |  |  |  |
|  | T1+T2 | 1.00 |  |  | 0.013 |  | 1.00 |  |  | 0.009 |  |
|  | T3 | 0.30 | (0.12 | -0.78) |  |  | 0.29 | (0.11 | -0.73) |  |  |
|  |  |  |  |  |  |  |  |  |  |  |  |
|  | **IgG N OC43** |  |  |  |  |  |  |  |  |  |  |
|  | T1+T2 | 1.00 |  |  | 0.012 |  | – |  |  |  |  |
|  | T3 | 0.27 | (0.10 | -0.75) |  |  |  |  |  |  |  |
|  |  |  |  |  |  |  |  |  |  |  |  |
|  | **IgM EBV EA-D** |  |  |  |  |  |  |  |  |  |  |
|  | T1+T2 | – |  |  |  |  | 1.00 |  |  | 0.031 |  |
|  | T3 |  |  |  |  |  | 2.59 | (1.09 | -6.15) |  |  |
|  |  |  |  |  |  |  |  |  |  |  |  |
| **2a** | **IL-8** |  |  |  |  | **2b** |  |  |  |  |  |
|  | T1+T2 | 1.00 |  |  | 0.006 |  | 1.00 |  |  | 0.006 |  |
|  | T3 | 0.24 | (0.09 | -0.67) |  |  | 0.25 | (0.09 | -0.66) |  |  |
|  |  |  |  |  |  |  |  |  |  |  |  |
|  | **MIP-1α** |  |  |  |  |  |  |  |  |  |  |
|  | T1+T2 | 1.00 |  |  | 0.010 |  | – |  |  |  |  |
|  | T3 | 3.13 | (1.31 | -7.44) |  |  |  |  |  |  |  |
|  |  |  |  |  |  |  |  |  |  |  |  |
|  | **IL-15** |  |  |  |  |  |  |  |  |  |  |
|  | Not quantified | – |  |  |  |  | 1.00 |  |  | 0.048 |  |
|  | Quantified |  |  |  |  |  | 2.45 | (1.01 | -5.95) |  |  |
|  |  |  |  |  |  |  |  |  |  |  |  |
|  | **IgG CMV pp150** |  |  |  |  |  |  |  |  |  |  |
|  | T1 | 1.00 |  |  | 0.055 |  | 1.00 |  |  | 0.028 |  |
|  | T2+T3 | 0.43 | (0.18 | -1.02) |  |  | 0.38 | (0.16 | -0.90) |  |  |
|  |  |  |  |  |  |  |  |  |  |  |  |
|  | **IgG N OC43** |  |  |  |  |  |  |  |  |  |  |
|  | T1+T2 | 1.00 |  |  | 0.042 |  | 1.00 |  |  | 0.069 |  |
|  | T3 | 0.36 | (0.14 | -0.97) |  |  | 0.41 | (0.16 | -1.07) |  |  |
|  |  |  |  |  |  |  |  |  |  |  |  |
| **3a** | **MIP-1α** |  |  |  |  | **3b** |  |  |  |  |  |
|  | T1+T2 | 1.00 |  |  | 0.004 |  | 1.00 |  |  | 0.008 |  |
|  | T3 | 3.82 | (1.53 | -9.58) |  |  | 3.14 | (1.34 | -7.36) |  |  |
|  |  |  |  |  |  |  |  |  |  |  |  |
|  | **G-CSF** |  |  |  |  |  |  |  |  |  |  |
|  | T1 | 1.00 |  |  | 0.032 |  | – |  |  |  |  |
|  | T2+T3 | 0.37 | (0.15 | -0.92) |  |  |  |  |  |  |  |
|  |  |  |  |  |  |  |  |  |  |  |  |
|  | **TNF-α** |  |  |  |  |  |  |  |  |  |  |
|  | T1 | – |  |  |  |  | 1.00 |  |  | 0.031 |  |
|  | T2+T3 |  |  |  |  |  | 0.39 | (0.17 | -0.92) |  |  |
|  |  |  |  |  |  |  |  |  |  |  |  |
|  | **IgG EBV VCAp18** |  |  |  |  |  |  |  |  |  |  |
|  | T1+T2 | 1.00 |  |  | 0.043 |  | 1.00 |  |  | 0.049 |  |
|  | T3 | 0.39 | (0.16 | -0.97) |  |  | 0.41 | (0.17 | -1.00) |  |  |
|  |  |  |  |  |  |  |  |  |  |  |  |
|  | **IgM EBV EA-D** |  |  |  |  |  |  |  |  |  |  |
|  | T1+T2 | 1.00 |  |  | 0.023 |  | 1.00 |  |  | 0.033 |  |
|  | T3 | 2.66 | (1.15 | -6.16) |  |  | 2.48 | (1.08 | -5.70) |  |  |
|  |  |  |  |  |  |  |  |  |  |  |  |

[ continued ]

**Table 5.** Continued.

| **Model** | | **ORa** | **(95% CI)** | | **Pb** | **Model** | **ORa** | **(95% CI)** | | **Pb** |  |
| --- | --- | --- | --- | --- | --- | --- | --- | --- | --- | --- | --- |
| **4** | **IL-8** |  |  |  |  |  |  |  |  |  |  |
|  | T1+T2 | 1.00 |  |  | 0.003 |  |  |  |  |  |  |
|  | T3 | 0.22 | (0.08 | -0.59) |  |  |  |  |  |  |  |
|  |  |  |  |  |  |  |  |  |  |  |  |
|  | **IL-17** |  |  |  |  |  |  |  |  |  |  |
|  | Not quantified | 1.00 |  |  | 0.014 |  |  |  |  |  |  |
|  | Quantified | 3.11 | (1.25 | -7.69) |  |  |  |  |  |  |  |
|  |  |  |  |  |  |  |  |  |  |  |  |
|  | **IgA CMV pp150** |  |  |  |  |  |  |  |  |  |  |
|  | T1+T2 | 1.00 |  |  | 0.010 |  |  |  |  |  |  |
|  | T3 | 0.29 | (0.11 | -0.75) |  |  |  |  |  |  |  |
|  |  |  |  |  |  |  |  |  |  |  |  |
|  | **IgG N OC43** |  |  |  |  |  |  |  |  |  |  |
|  | T1+T2 | 1.00 |  |  | 0.012 |  |  |  |  |  |  |
|  | T3 | 0.27 | (0.10 | -0.75) |  |  |  |  |  |  |  |
|  |  |  |  |  |  |  |  |  |  |  |  |
| **5a** | **IL-8** |  |  |  |  | **5b** |  |  |  |  |  |
|  | T1+T2 | – |  |  |  |  | 1.00 |  |  | 0.005 |  |
|  | T3 |  |  |  |  |  | 0.23 | (0.08 | -0.65) |  |  |
|  |  |  |  |  |  |  |  |  |  |  |  |
|  | **MIP-1α** |  |  |  |  |  |  |  |  |  |  |
|  | T1+T2 | 1.00 |  |  | 0.004 |  | 1.00 |  |  | 0.005 |  |
|  | T3 | 4.08 | (1.58 | -10.50) |  |  | 3.66 | (1.47 | -9.11) |  |  |
|  |  |  |  |  |  |  |  |  |  |  |  |
|  | **G-CSF** |  |  |  |  |  |  |  |  |  |  |
|  | T1 | 1.00 |  |  | 0.044 |  | – |  |  |  |  |
|  | T2+T3 | 0.38 | (0.15 | -0.97) |  |  |  |  |  |  |  |
|  |  |  |  |  |  |  |  |  |  |  |  |
|  | **IgA CMV pp150** |  |  |  |  |  |  |  |  |  |  |
|  | T1+T2 | 1.00 |  |  | 0.026 |  | 1.00 |  |  | 0.006 |  |
|  | T3 | 0.35 | (0.14 | -0.88) |  |  | 0.25 | (0.10 | -0.67) |  |  |
|  |  |  |  |  |  |  |  |  |  |  |  |
|  | **IgG EBV VCAp18** |  |  |  |  |  |  |  |  |  |  |
|  | T1+T2 | 1.00 |  |  | 0.041 |  | – |  |  |  |  |
|  | T3 | 0.39 | (0.15 | -0.96) |  |  |  |  |  |  |  |
|  |  |  |  |  |  |  |  |  |  |  |  |
|  | **IgG N OC43** |  |  |  |  |  |  |  |  |  |  |
|  | T1+T2 | – |  |  |  |  | 1.00 |  |  | 0.014 |  |
|  | T3 |  |  |  |  |  | 0.27 | (0.10 | -0.77) |  |  |
|  |  |  |  |  |  |  |  |  |  |  |  |
|  | **IgM EBV EA-D** |  |  |  |  |  |  |  |  |  |  |
|  | T1+T2 | 1.00 |  |  | 0.008 |  | 1.00 |  |  | 0.038 |  |
|  | T3 | 3.35 | (1.38 | -8.15) |  |  | 2.55 | (1.05 | -6.20) |  |  |
|  |  |  |  |  |  |  |  |  |  |  |  |
| **6a** | **MIP-1α** |  |  |  |  | **6b** |  |  |  |  |  |
|  | T1+T2 | 1.00 |  |  | 0.003 |  | 1.00 |  |  | 0.003 |  |
|  | T3 | 3.98 | (1.61 | -9.85) |  |  | 3.97 | (1.59 | -9.87) |  |  |
|  |  |  |  |  |  |  |  |  |  |  |  |
|  | **TNF-α** |  |  |  |  |  |  |  |  |  |  |
|  | T1 | 1.00 |  |  | 0.023 |  | 1.00 |  |  | 0.038 |  |
|  | T2+T3 | 0.35 | (0.14 | -0.86) |  |  | 0.39 | (0.16 | -0.95) |  |  |
|  |  |  |  |  |  |  |  |  |  |  |  |
|  | **IgA CMV pp150** |  |  |  |  |  |  |  |  |  |  |
|  | T1+T2 | 1.00 |  |  | 0.020 |  | 1.00 |  |  | 0.019 |  |
|  | T3 | 0.32 | (0.12 | -0.84) |  |  | 0.31 | (0.12 | -0.83) |  |  |
|  |  |  |  |  |  |  |  |  |  |  |  |
|  | **IgG N OC43** |  |  |  |  |  |  |  |  |  |  |
|  | T1+T2 | 1.00 |  |  | 0.009 |  | 1.00 |  |  | 0.012 |  |
|  | T3 | 0.26 | (0.10 | -0.72) |  |  | 0.27 | (0.10 | -0.75) |  |  |
|  |  |  |  |  |  |  |  |  |  |  |  |
|  | **IgM CMV pp65** |  |  |  |  |  |  |  |  |  |  |
|  | T1 | 1.00 |  |  | 0.026 |  | – |  |  |  |  |
|  | T2+T3 | 3.30 | (1.16 | -9.39) |  |  |  |  |  |  |  |
|  |  |  |  |  |  |  |  |  |  |  |  |
|  | **IgM EBV EA-D** |  |  |  |  |  |  |  |  |  |  |
|  | T1+T2 | – |  |  |  |  | 1.00 |  |  | 0.019 |  |
|  | T3 |  |  |  |  |  | 2.88 | (1.19 | -6.99) |  |  |
|  |  |  |  |  |  |  |  |  |  |  |  |

* The odds ratios (ORs) quantify the magnitude of the associations between the immunoglobulin isotype-antigen pair and SARS-CoV-2 seropositivity in the 145 individuals, 41 SARS-CoV-2 seropositives and 104 seronegatives. An OR of 1.00 denotes the reference category. T1 to T3: tertiles.

a Odds ratios of the isotype-antigen pair of the immunoglobulins were always mutually adjusted for, and further adjusted by household outdoor index and smoking (both confounders p<0.25). b Wald’s test (two-tailed).

**Table 6.** Effect of individual cytokine levels measured in 2016-17

on the risk of COVID-19 in 2020-21 (N=154)*

| **Cytokine** | **ORa** | **(IC 95%)** | | **Pb** |  |
| --- | --- | --- | --- | --- | --- |
| **Growth factors** |  |  |  |  |  |
| **G-CSF** |  |  |  |  |  |
| T1 | 1.00 |  |  | 0.121 |  |
| T2 | 0.33 | (0.09 | -1.16) | **0.075** | d |
| T3 | 0.34 | (0.09 | -1.25) |  |  |
|  |  |  |  |  |  |
| T1 | 1.00 |  |  | **0.040** |  |
| T2+T3 | **0.33** | (0.12 | -0.95) |  |  |
|  |  |  |  |  |  |
| continuousc | **0.37** | (0.17 | -0.83) | **0.016** |  |
|  |  |  |  |  |  |
| **EGF** |  |  |  |  |  |
| T1 | 1.00 |  |  | 0.951 |  |
| T2 | 0.84 | (0.25 | -2.83) |  |  |
| T3 | 0.86 | (0.26 | -2.83) |  |  |
|  |  |  |  |  |  |
| continuousc | 1.01 | (0.44 | -2.31) | 0.980 |  |
|  |  |  |  |  |  |
| **FGF** |  |  |  |  |  |
| T1 | 1.00 |  |  | 0.748 |  |
| T2 | 0.69 | (0.21 | -2.28) |  |  |
| T3 | 0.66 | (0.20 | -2.20) |  |  |
|  |  |  |  |  |  |
| continuousc | 0.76 | (0.34 | -1.73) | 0.515 |  |
|  |  |  |  |  |  |
| **GM-CSF** |  |  |  |  |  |
| T1 | 1.00 |  |  | 0.554 |  |
| T2 | 0.52 | (0.16 | -1.72) |  |  |
| T3 | 0.71 | (0.22 | -2.34) |  |  |
|  |  |  |  |  |  |
| T1 | 1.00 |  |  | 0.317 |  |
| T2+T3 | 0.60 | (0.22 | -1.63) |  |  |
|  |  |  |  |  |  |
| continuousc | 0.81 | (0.48 | -1.37) | 0.430 |  |
|  |  |  |  |  |  |
| **HGF** |  |  |  |  |  |
| T1 | 1.00 |  |  | 0.849 |  |
| T2 | 1.18 | (0.36 | -3.89) |  |  |
| T3 | 0.83 | (0.22 | -3.14) |  |  |
|  |  |  |  |  |  |
| continuousc | 0.61 | (0.14 | -2.61) | 0.504 |  |
|  |  |  |  |  |  |
| **VEGF** |  |  |  |  |  |
| T1 | 1.00 |  |  | 0.737 |  |
| T2 | 1.62 | (0.48 | -5.49) |  |  |
| T3 | 1.32 | (0.36 | -4.84) |  |  |
|  |  |  |  |  |  |
| continuousc | 0.82 | (0.30 | -2.23) | 0.690 |  |
|  |  |  |  |  |  |

[ continued ]

**Table 6.** Continued.

| **Cytokine** | **ORa** | **(IC 95%)** | | **Pb** |  |
| --- | --- | --- | --- | --- | --- |
| **Chemokines** |  |  |  |  |  |
| **IL-8** |  |  |  |  |  |
| T1 | 1.00 |  |  | 0.008 |  |
| T2 | 2.74 | (0.89 | -8.42) |  |  |
| T3 | 0.12 | (0.01 | -1.01) |  |  |
|  |  |  |  |  |  |
| T1+T2 | 1.00 |  |  | **0.012** |  |
| T3 | **0.07** | (0.01 | -0.55) |  |  |
|  |  |  |  |  |  |
| continuousc | **0.13** | (0.02 | -0.75) | **0.023** |  |
|  |  |  |  |  |  |
| **IP-10** |  |  |  |  |  |
| T1 | 1.00 |  |  | 0.441 |  |
| T2 | 0.86 | (0.29 | -2.60) | 0.226 | d |
| T3 | 0.40 | (0.10 | -1.67) |  |  |
|  |  |  |  |  |  |
| T1+T2 | 1.00 |  |  | 0.211 |  |
| T3 | 0.43 | (0.12 | -1.61) |  |  |
|  |  |  |  |  |  |
| continuousc | 0.77 | (0.17 | -3.61) | 0.742 |  |
|  |  |  |  |  |  |
| **RANTES** |  |  |  |  |  |
| T1 | 1.00 |  |  | 0.355 |  |
| T2 | 0.36 | (0.09 | -1.53) |  |  |
| T3 | 0.63 | (0.21 | -1.88) |  |  |
|  |  |  |  |  |  |
| T1 | 1.00 |  |  | 0.195 |  |
| T2+T3 | 0.52 | (0.19 | -1.40) |  |  |
|  |  |  |  |  |  |
| continuousc | 0.39 | (0.03 | -4.87) | 0.463 |  |
|  |  |  |  |  |  |
| **EOTAXIN** |  |  |  |  |  |
| T1 | 1.00 |  |  | 0.743 |  |
| T2 | 1.52 | (0.46 | -5.09) |  |  |
| T3 | 1.56 | (0.42 | -5.73) |  |  |
|  |  |  |  |  |  |
| continuousc | 2.14 | (0.14 | -32.78) | 0.586 |  |
|  |  |  |  |  |  |
| **MIP-1α** |  |  |  |  |  |
| T1 | 1.00 |  |  | 0.182 |  |
| T2 | 0.43 | (0.11 | -1.75) |  |  |
| T3 | 1.55 | (0.49 | -4.88) |  |  |
|  |  |  |  |  |  |
| T1+T2 | 1.00 |  |  | 0.128 |  |
| T3 | 2.22 | (0.80 | -6.19) |  |  |
|  |  |  |  |  |  |
| continuousc | 1.18 | (0.60 | -2.31) | 0.637 |  |
|  |  |  |  |  |  |
| **MIP-1β** |  |  |  |  |  |
| T1 | 1.00 |  |  | 0.966 |  |
| T2 | 1.04 | (0.30 | -3.62) |  |  |
| T3 | 1.17 | (0.34 | -4.02) |  |  |
|  |  |  |  |  |  |
| continuousc | 1.18 | (0.52 | -2.69) | 0.687 |  |
|  |  |  |  |  |  |
| **MCP-1** |  |  |  |  |  |
| T1 | 1.00 |  |  | 0.198 |  |
| T2 | 0.36 | (0.09 | -1.48) |  |  |
| T3 | 1.34 | (0.42 | -4.25) |  |  |
|  |  |  |  |  |  |
| continuousc | 1.14 | (0.13 | -10.03) | 0.907 |  |
|  |  |  |  |  |  |
| **MIG** |  |  |  |  |  |
| Not quantified | 1.00 |  |  | 0.949 |  |
| Quantified | 1.03 | (0.38 | -2.84) |  |  |
|  |  |  |  |  |  |

[ continued ]

**Table 6.** Continued.

| **Cytokine** | **ORa** | **(IC 95%)** | | **Pb** |  |
| --- | --- | --- | --- | --- | --- |
| **TH1** |  |  |  |  |  |
| **IL-2** |  |  |  |  |  |
| T1 | 1.00 |  |  | 0.591 |  |
| T2 | 0.56 | (0.16 | -1.92) |  |  |
| T3 | 0.97 | (0.29 | -3.20) |  |  |
|  |  |  |  |  |  |
| continuousc | 1.01 | (0.62 | -1.66) | 0.969 |  |
|  |  |  |  |  |  |
| **IL-12** |  |  |  |  |  |
| T1 | 1.00 |  |  | 0.363 |  |
| T2 | 2.46 | (0.60 | -10.16) | 0.190 | d |
| T3 | 2.75 | (0.64 | -11.70) |  |  |
|  |  |  |  |  |  |
| T1 | 1.00 |  |  | 0.159 |  |
| T2+T3 | 2.59 | (0.69 | -9.71) |  |  |
|  |  |  |  |  |  |
| continuousc | 1.30 | (0.31 | -5.51) | 0.719 |  |
|  |  |  |  |  |  |
| **IFN-γ** |  |  |  |  |  |
| Not quantified | 1.00 |  |  | 0.955 |  |
| Quantified | 1.04 | (0.26 | -4.21) |  |  |
| **TH2** |  |  |  |  |  |
| **IL-4** |  |  |  |  |  |
| Not quantified | 1.00 |  |  | **0.041** |  |
| Quantified | **0.20** | (0.04 | -0.93) |  |  |
|  |  |  |  |  |  |
| **IL-5** |  |  |  |  |  |
| Q1+Q2e | 1.00 |  |  | 0.215 |  |
| Q3 | 1.04 | (0.31 | -3.41) | 0.097 | d |
| Q4 | 0.16 | (0.02 | -1.28) |  |  |
|  |  |  |  |  |  |
| ≤Q3 | 1.00 |  |  | 0.080 |  |
| Q4 | 0.16 | (0.02 | -1.25) |  |  |
|  |  |  |  |  |  |
| continuousc | 0.49 | (0.12 | -1.89) | 0.298 |  |
|  |  |  |  |  |  |
| **IL-13** |  |  |  |  |  |
| T1 | 1.00 |  |  | 0.642 |  |
| T2 | 0.80 | (0.24 | -2.67) | 0.347 | d |
| T3 | 0.56 | (0.17 | -1.87) |  |  |
|  |  |  |  |  |  |
| T1 | 1.00 |  |  | 0.414 |  |
| T2+T3 | 0.66 | (0.25 | -1.78) |  |  |
|  |  |  |  |  |  |
| continuousc | 0.76 | (0.37 | -1.56) | 0.453 |  |
|  |  |  |  |  |  |

[ continued ]

**Table 6.** Continued.

| **Cytokine** | **ORa** | **(IC 95%)** | | **Pb** |  |
| --- | --- | --- | --- | --- | --- |
|  |  |  |  |  |  |
| **Pro-inflammatory** |  |  |  |  |  |
| **IL-1β** |  |  |  |  |  |
| T1 | 1.00 |  |  | 0.814 |  |
| T2 | 1.21 | (0.38 | -3.82) |  |  |
| T3 | 0.81 | (0.22 | -2.95) |  |  |
|  |  |  |  |  |  |
| continuousc | 0.69 | (0.27 | -1.77) | 0.442 |  |
|  |  |  |  |  |  |
| **TNF-α** |  |  |  |  |  |
| T1 | 1.00 |  |  | **0.050** |  |
| T2 | **0.34** | (0.10 | -1.13) | **0.021** | d |
| T3 | **0.23** | (0.06 | -0.85) |  |  |
|  |  |  |  |  |  |
| T1 | 1.00 |  |  | **0.016** |  |
| T2+T3 | **0.28** | (0.10 | -0.79) |  |  |
|  |  |  |  |  |  |
| continuousc | **0.43** | (0.20 | -0.90) | **0.025** |  |
|  |  |  |  |  |  |
| **IL-6** |  |  |  |  |  |
| T1 | 1.00 |  |  | 0.556 |  |
| T2 | 1.09 | (0.34 | -3.48) |  |  |
| T3 | 0.54 | (0.16 | -1.95) |  |  |
|  |  |  |  |  |  |
| T1+T2 | 1.00 |  |  | 0.283 |  |
| T3 | 0.54 | (0.18 | -1.66) |  |  |
|  |  |  |  |  |  |
| continuousc | 0.71 | (0.37 | -1.35) | 0.296 |  |
|  |  |  |  |  |  |
| **IFN-α** |  |  |  |  |  |
| T1 | 1.00 |  |  | 0.578 |  |
| T2 | 0.59 | (0.17 | -2.10) |  |  |
| T3 | 1.15 | (0.35 | -3.80) |  |  |
|  |  |  |  |  |  |
| continuousc | 0.92 | (0.45 | -1.87) | 0.815 |  |
|  |  |  |  |  |  |
| **IL-2R** |  |  |  |  |  |
| T1 | 1.00 |  |  | 0.130 |  |
| T2 | 0.46 | (0.15 | -1.41) | **0.039** | d |
| T3 | 0.27 | (0.07 | -1.09) |  |  |
|  |  |  |  |  |  |
| T1 | 1.00 |  |  | **0.051** |  |
| T2+T3 | **0.37** | (0.14 | -1.00) |  |  |
|  |  |  |  |  |  |
| continuousc | **0.37** | (0.15 | -0.95) | **0.039** |  |
|  |  |  |  |  |  |
| **IL-17** |  |  |  |  |  |
| Not quantified | 1.00 |  |  | 0.868 |  |
| Quantified | 0.91 | (0.31 | -2.69) |  |  |
| **Regulatory** |  |  |  |  |  |
| **IL-7** |  |  |  |  |  |
| T1 | 1.00 |  |  | 0.512 |  |
| T2 | 0.48 | (0.14 | -1.67) |  |  |
| T3 | 0.77 | (0.24 | -2.48) |  |  |
|  |  |  |  |  |  |
| continuousc | 0.85 | (0.39 | -1.83) | 0.670 |  |
|  |  |  |  |  |  |

[ continued ]

**Table 6.** Continued.

| **Cytokine** | **ORa** | **(IC 95%)** | | **Pb** |  |
| --- | --- | --- | --- | --- | --- |
|  |  |  |  |  |  |
| **Anti-inflammatory** |  |  |  |  |  |
| **IL-10** |  |  |  |  |  |
| Not quantified | 1.00 |  |  | 0.158 |  |
| Quantified | 0.49 | (0.18 | -1.32) |  |  |
|  |  |  |  |  |  |
| **IL-15** |  |  |  |  |  |
| Not quantified | 1.00 |  |  | 0.522 |  |
| Quantified | 1.41 | (0.49 | -4.03) |  |  |
|  |  |  |  |  |  |
| **IL-1RA** |  |  |  |  |  |
| T1 | 1.00 |  |  | 0.625 |  |
| T2 | 0.75 | (0.23 | -2.43) | 0.332 | d |
| T3 | 0.55 | (0.16 | -1.85) |  |  |
|  |  |  |  |  |  |
| T1 | 1.00 |  |  | 0.387 |  |
| T2+T3 | 0.64 | (0.24 | -1.74) |  |  |
|  |  |  |  |  |  |
| continuousc | 0.49 | (0.15 | -1.58) | 0.235 |  |
|  |  |  |  |  |  |

* The odds ratios quantify the magnitude of the associations between the cytokines’ levels (pg/mL) and COVID-19 in the 20 individuals with COVID-19 and the 134 individuals without the disease.

T1 to T3: tertiles. Q1 to Q4: quartiles.

For categorical values of cytokines, ORs shown in bold are ORs ≥2.5 or ORs ≤0.4 with *p* values <0.05.

For continuous values of cytokines, ORs are shown in bold if their *p* values <0.05.

a Odds ratios were always adjusted for age, smoking, and educational level.

b Unless otherwise specified, *p*‑value derived from Wald’s test.

c Odds ratio for each increase of 10 times in the level of the cytokine or factor.

d Multivariate analogue of Mantel’s extension test for linear trend.

e The category is exclusively made up of individuals whose cytokine level was less than the respective lower limit of quantification (see Methods, section 2.3).

When we analyzed the risk of COVID-19 disease (vs. no disease), the cytokines IP-10, IL-5, and IL-10 had odds ratios between 0.16 and 0.43, not statistically significantly, in their respective dichotomous forms (T3 vs. T1+T2 for IP-10, Q4 vs. ≤Q3 for IL-5, and quantified vs. not quantified for IL-10).

Tables 1 and 6 are the only parts of the article in which all 30 cytokines appear, thus including cytokines that are not associated with the respective outcomes, SARS-CoV-2 seropositivity and COVID-19 disease.

**Table 7.** Influence of mixtures of cytokines on the risk of COVID-19 (N = 154)*

| **Model** | | **ORa** | **(95% CI)** | | **Pb** | **Model** | **ORa** | **(95% CI)** | | **Pb** |  |
| --- | --- | --- | --- | --- | --- | --- | --- | --- | --- | --- | --- |
| **1a** | **IL-8** |  |  |  |  | **1b** |  |  |  |  |  |
|  | T1+T2 | ‒ |  |  |  |  | 1.00 |  |  | 0.010 |  |
|  | T3 |  |  |  |  |  | 0.05 | (0.01 | -0.50) |  |  |
|  |  |  |  |  |  |  |  |  |  |  |  |
|  | **MIP-1α** |  |  |  |  |  |  |  |  |  |  |
|  | T1+T2 | 1.00 |  |  | 0.016 |  | 1.00 |  |  | 0.019 |  |
|  | T3 | 4.05 | (1.30 | -12.66) |  |  | 4.41 | (1.28 | -15.25) |  |  |
|  |  |  |  |  |  |  |  |  |  |  |  |
|  | **IL-5** |  |  |  |  |  |  |  |  |  |  |
|  | ≤Q3 | 1.00 |  |  | 0.048 |  | 1.00 |  |  | 0.023 |  |
|  | Q4 | 0.11 | (0.01 | -0.98) |  |  | 0.07 | (0.01 | -0.69) |  |  |
|  |  |  |  |  |  |  |  |  |  |  |  |
|  | **TNF-α** |  |  |  |  |  |  |  |  |  |  |
|  | T1 | 1.00 |  |  | 0.011 |  | 1.00 |  |  | 0.029 |  |
|  | T2+T3 | 0.24 | (0.08 | -0.72) |  |  | 0.27 | (0.08 | -0.87) |  |  |
|  |  |  |  |  |  |  |  |  |  |  |  |
| **2a** | **IL-8** |  |  |  |  | **2bc** |  |  |  |  |  |
|  | T1+T2 | 1.00 |  |  | 0.020 |  | 1.00 |  |  | 0.007 |  |
|  | T3 | 0.08 | (0.01 | -0.67) |  |  | 0.05 | (0.01 | -0.44) |  |  |
|  |  |  |  |  |  |  |  |  |  |  |  |
|  | **MIP-1α** |  |  |  |  |  |  |  |  |  |  |
|  | T1+T2 | 1.00 |  |  | 0.007 |  | 1.00 |  |  | 0.078 |  |
|  | T3 | 6.84 | (1.70 | -27.58) |  |  | 3.15 | (0.88 | -11.32) |  |  |
|  |  |  |  |  |  |  |  |  |  |  |  |
|  | **IL-5** |  |  |  |  |  |  |  |  |  |  |
|  | ≤Q3 | ‒ |  |  |  |  | 1.00 |  |  | 0.049 |  |
|  | Q4 |  |  |  |  |  | 0.11 | (0.01 | -0.99) |  |  |
|  |  |  |  |  |  |  |  |  |  |  |  |
|  | **IL-2R** |  |  |  |  |  |  |  |  |  |  |
|  | T1 | 1.00 |  |  | 0.092 |  | 1.00 |  |  | 0.049 |  |
|  | T2+T3 | 0.34 | (0.10 | -1.19) |  |  | 0.29 | (0.09 | -1.00) |  |  |
|  |  |  |  |  |  |  |  |  |  |  |  |
|  | **IL-4** |  |  |  |  |  |  |  |  |  |  |
|  | Not quantified | 1.00 |  |  | 0.040 |  | ‒ |  |  |  |  |
|  | Quantified | 0.14 | (0.02 | -0.92) |  |  |  |  |  |  |  |
|  |  |  |  |  |  |  |  |  |  |  |  |
|  | **IL-12** |  |  |  |  |  |  |  |  |  |  |
|  | T1 | ‒ |  |  |  |  | 1.00 |  |  | 0.144 |  |
|  | T2+T3 |  |  |  |  |  | 2.84 | (0.70 | -11.55) |  |  |
|  |  |  |  |  |  |  |  |  |  |  |  |
| **3a** | **IL-8** |  |  |  |  | **3bc** |  |  |  |  |  |
|  | T1+T2 | 1.00 |  |  | 0.022 |  | 1.00 |  |  | 0.018 |  |
|  | T3 | 0.08 | (0.01 | -0.69) |  |  | 0.08 | (0.01 | -0.65) |  |  |
|  |  |  |  |  |  |  |  |  |  |  |  |
|  | **MIP-1α** |  |  |  |  |  |  |  |  |  |  |
|  | T1+T2 | 1.00 |  |  | 0.006 |  | 1.00 |  |  | 0.028 |  |
|  | T3 | 7.19 | (1.78 | -29.05) |  |  | 4.04 | (1.16 | -14.04) |  |  |
|  |  |  |  |  |  |  |  |  |  |  |  |
|  | **G-CSF** |  |  |  |  |  |  |  |  |  |  |
|  | T1 | 1.00 |  |  | 0.084 |  | 1.00 |  |  | 0.018 |  |
|  | T2+T3 | 0.31 | (0.08 | -1.17) |  |  | 0.21 | (0.06 | -0.79) |  |  |
|  |  |  |  |  |  |  |  |  |  |  |  |
|  | **IL-4** |  |  |  |  |  |  |  |  |  |  |
|  | Not quantified | 1.00 |  |  | 0.046 |  | ‒ |  |  |  |  |
|  | Quantified | 0.15 | (0.02 | -0.96) |  |  |  |  |  |  |  |
|  |  |  |  |  |  |  |  |  |  |  |  |

* The odds ratios (ORs) quantify the magnitude of the associations between the exposures and COVID-19 in the 154 individuals, 20 with COVID-19 and 134 without the disease. An OR of 1.00 denotes the reference category.

T1 to T3: tertiles. Q1 to Q4: quartiles.

a Odds ratios of the cytokines were mutually adjusted for, and further adjusted by age, education, and smoking (all three confounders p<0.25).b Wald’s test (two-tailed).

c Odds ratios of the cytokines were mutually adjusted for, and further adjusted by education (confounder p<0.25).

**Table 8.** Effect of selected individual isotype-antigen pairs for cytomegalovirus, Epstein-Barr virus, and common cold infections measured in 2016-17 on the risk of COVID-19 in 2020-21 (N=154)*

| **Isotype-antigen pair** | **ORa** | **(IC 95%)** | | **Pb** |  |
| --- | --- | --- | --- | --- | --- |
|  |  |  |  |  |  |
| **IgA CMV pp150** |  |  |  |  |  |
| T1 | 1.00 |  |  | 0.109 |  |
| T2 | 1.62 | (0.49 | -5.42) |  |  |
| T3 | 0.37 | (0.08 | -1.77) |  |  |
|  |  |  |  |  |  |
| T1+T2 | 1.00 |  |  | 0.053 |  |
| T3 | 0.27 | (0.07 | -1.02) |  |  |
|  |  |  |  |  |  |
| continuousc | 0.21 | (0.03 | -1.70) | 0.144 |  |
|  |  |  |  |  |  |
| **IgA CMV pp65** |  |  |  |  |  |
| T1 | 1.00 |  |  | 0.111 |  |
| T2 | 0.31 | (0.09 | -1.07) |  |  |
| T3 | 0.35 | (0.10 | -1.22) |  |  |
|  |  |  |  |  |  |
| T1 | 1.00 |  |  | **0.036** |  |
| T2+T3 | **0.33** | (0.12 | -0.93) |  |  |
|  |  |  |  |  |  |
| continuousc | 0.41 | (0.06 | -2.63) | 0.348 |  |
|  |  |  |  |  |  |
| **IgA EBV EA-D** |  |  |  |  |  |
| T1 | 1.00 |  |  | 0.157 |  |
| T2 | 0.27 | (0.07 | -1.07) |  |  |
| T3 | 0.56 | (0.17 | -1.79) |  |  |
|  |  |  |  |  |  |
| T1 | 1.00 |  |  | 0.075 |  |
| T2+T3 | 0.40 | (0.15 | -1.10) |  |  |
|  |  |  |  |  |  |
| continuousc | 0.12 | (0.01 | -1.18) | 0.069 |  |
|  |  |  |  |  |  |
| **IgA N 229E** |  |  |  |  |  |
| T1 | 1.00 |  |  | 0.099 |  |
| T2 | 0.35 | (0.10 | -1.18) | 0.052 | d |
| T3 | 0.30 | (0.09 | -1.05) |  |  |
|  |  |  |  |  |  |
| T1 | 1.00 |  |  | **0.032** |  |
| T2+T3 | **0.33** | (0.12 | -0.91) |  |  |
|  |  |  |  |  |  |
| continuousc | **0.27** | (0.08 | -0.99) | **0.048** |  |
|  |  |  |  |  |  |
| **IgG EBV EA-D**e |  |  |  |  |  |
| T1 | 1.00 |  |  | 0.065 |  |
| T2 | **0.30** | (0.09 | -1.01) | **0.044** | d |
| T3 | **0.30** | (0.09 | -0.99) |  |  |
|  |  |  |  |  |  |
| T1 | 1.00 |  |  | **0.019** |  |
| T2+T3 | **0.30** | (0.11 | -0.82) |  |  |
|  |  |  |  |  |  |
| continuousc | 0.15 | (0.01 | -1.58) | 0.113 |  |
|  |  |  |  |  |  |
| **IgG EBV VCAp18** |  |  |  |  |  |
| T1 | 1.00 |  |  | 0.123 |  |
| T2 | 0.77 | (0.25 | -2.35) | **0.042** | d |
| T3 | **0.24** | (0.06 | -0.95) |  |  |
|  |  |  |  |  |  |
| T1+ T2 | 1.00 |  |  | **0.047** |  |
| T3 | **0.26** | (0.07 | -0.98) |  |  |
|  |  |  |  |  |  |
| continuousc | **0.23** | (0.06 | -0.94) | **0.041** |  |
|  |  |  |  |  |  |

* This Table shows results for the 6 immunoglobulins most related to COVID-19; results for the other 18 immunoglobulins are shown in Supplementary Table 4. The odds ratios quantify the magnitude of the associations between the exposures and COVID-19 in the 20 individuals with COVID-19 and the 134 individuals without the disease. T1 to T3: tertiles.

For categorical values of immunoglobulins, ORs shown in bold are ORs ≥2.5 or ORs ≤0.4 with *p* values <0.05.

For continuous values of immunoglobulins, ORs are shown in bold if their *p* values <0.05.

a Unless otherwise specified, odds ratios were adjusted for age, smoking, and educational level. b Unless otherwise specified, *p*‑value derived from Wald’s test. c Odds ratio for each increase of 10 times in the level of the isotype-antigen pair. d Multivariate analogue of Mantel’s extension test for linear trend.

e Odds ratios adjusted for age and smoking.

**Table 9.** Influence of mixtures of isotype-antigen pairs for cytomegalovirus, Epstein-Barr virus,

and common cold infections on the risk of COVID-19 (N = 154)*

| **Model** | | **ORa** | **(95% CI)** | | **Pb** | **Model** | **ORa** | **(95% CI)** | | **Pb** |  |
| --- | --- | --- | --- | --- | --- | --- | --- | --- | --- | --- | --- |
| **1ac** | **IgA CMV pp150** |  |  |  |  | **1bc** |  |  |  |  |  |
|  | T1+T2 | 1.00 |  |  | 0.159 |  | ‒ |  |  |  |  |
|  | T3 | 0.35 | (0.08 | -1.51) |  |  |  |  |  |  |  |
|  |  |  |  |  |  |  |  |  |  |  |  |
|  | **IgA CMV pp65** |  |  |  |  |  |  |  |  |  |  |
|  | T1 | 1.00 |  |  | 0.020 |  | 1.00 |  |  | 0.008 |  |
|  | T2+T3 | 0.26 | (0.08 | -0.81) |  |  | 0.22 | (0.07 | -0.67) |  |  |
|  |  |  |  |  |  |  |  |  |  |  |  |
|  | **IgG CMV pp150** |  |  |  |  |  |  |  |  |  |  |
|  | T1+T2 | 1.00 |  |  | 0.027 |  | 1.00 |  |  | 0.016 |  |
|  | T3 | 0.20 | (0.05 | -0.84) |  |  | 0.18 | (0.04 | -0.73) |  |  |
|  |  |  |  |  |  |  |  |  |  |  |  |
|  | **IgG EBV VCAp18** |  |  |  |  |  |  |  |  |  |  |
|  | T1+T2 | 1.00 |  |  | 0.023 |  | 1.00 |  |  | 0.022 |  |
|  | T3 | 0.19 | (0.05 | -0.80) |  |  | 0.19 | (0.05 | -0.79) |  |  |
|  |  |  |  |  |  |  |  |  |  |  |  |
| **2ac** | **IgA CMV pp65** |  |  |  |  | **2bc** |  |  |  |  |  |
|  | T1 | 1.00 |  |  | 0.027 |  | ‒ |  |  |  |  |
|  | T2+T3 | 0.27 | (0.09 | -0.86) |  |  |  |  |  |  |  |
|  |  |  |  |  |  |  |  |  |  |  |  |
|  | **IgA N OC43** |  |  |  |  |  |  |  |  |  |  |
|  | T1 | 1.00 |  |  | 0.142 |  | 1.00 |  |  | 0.035 |  |
|  | T2+T3 | 0.42 | (0.13 | -1.34) |  |  | 0.31 | (0.10 | -0.92) |  |  |
|  |  |  |  |  |  |  |  |  |  |  |  |
|  | **IgG CMV pp150** |  |  |  |  |  |  |  |  |  |  |
|  | T1+T2 | 1.00 |  |  | 0.013 |  | 1.00 |  |  | 0.021 |  |
|  | T3 | 0.16 | (0.04 | -0.68) |  |  | 0.19 | (0.05 | -0.78) |  |  |
|  |  |  |  |  |  |  |  |  |  |  |  |
|  | **IgG EBV VCAp18** |  |  |  |  |  |  |  |  |  |  |
|  | T1+T2 | 1.00 |  |  | 0.018 |  | 1.00 |  |  | 0.024 |  |
|  | T3 | 0.18 | (0.04 | -0.75) |  |  | 0.21 | (0.05 | -0.81) |  |  |
|  |  |  |  |  |  |  |  |  |  |  |  |
| **3a** | **IgA N 229E** |  |  |  |  | **3bc** |  |  |  |  |  |
|  | T1 | 1.00 |  |  | 0.038 |  | ‒ |  |  |  |  |
|  | T2+T3 | 0.31 | (0.10 | -0.94) |  |  |  |  |  |  |  |
|  |  |  |  |  |  |  |  |  |  |  |  |
|  | **IgG CMV pp150** |  |  |  |  |  |  |  |  |  |  |
|  | T1+T2 | 1.00 |  |  | 0.024 |  | 1.00 |  |  | 0.016 |  |
|  | T3 | 0.19 | (0.05 | -0.80) |  |  | 0.18 | (0.04 | -0.73) |  |  |
|  |  |  |  |  |  |  |  |  |  |  |  |
|  | **IgG EBV VCAp18** |  |  |  |  |  |  |  |  |  |  |
|  | T1+T2 | 1.00 |  |  | 0.044 |  | 1.00 |  |  | 0.022 |  |
|  | T3 | 0.24 | (0.06 | -0.96) |  |  | 0.19 | (0.05 | -0.79) |  |  |
|  |  |  |  |  |  |  |  |  |  |  |  |
|  | **IgA CMV pp65** |  |  |  |  |  |  |  |  |  |  |
|  | T1 | ‒ |  |  |  |  | 1.00 |  |  | 0.008 |  |
|  | T2+T3 |  |  |  |  |  | 0.22 | (0.07 | -0.67) |  |  |
|  |  |  |  |  |  |  |  |  |  |  |  |
| **4a** | **IgA N OC43** |  |  |  |  | **4b** |  |  |  |  |  |
|  | T1 | 1.00 |  |  | 0.040 |  | ‒ |  |  |  |  |
|  | T2+T3 | 0.31 | (0.10 | -0.95) |  |  |  |  |  |  |  |
|  |  |  |  |  |  |  |  |  |  |  |  |
|  | **IgG CMV pp150** |  |  |  |  |  |  |  |  |  |  |
|  | T1+T2 | 1.00 |  |  | 0.022 |  | 1.00 |  |  | 0.029 |  |
|  | T3 | 0.20 | (0.05 | -0.79) |  |  | 0.21 | (0.05 | -0.85) |  |  |
|  |  |  |  |  |  |  |  |  |  |  |  |
|  | **IgG EBV VCAp18** |  |  |  |  |  |  |  |  |  |  |
|  | T1+T2 | 1.00 |  |  | 0.019 |  | 1.00 |  |  | 0.020 |  |
|  | T3 | 0.19 | (0.05 | -0.76) |  |  | 0.19 | (0.05 | -0.77) |  |  |
|  |  |  |  |  |  |  |  |  |  |  |  |
|  | **IgA EBV EA-D** |  |  |  |  |  |  |  |  |  |  |
|  | T1 | ‒ |  |  |  |  | 1.00 |  |  | 0.049 |  |
|  | T2+T3 |  |  |  |  |  | 0.34 | (0.12 | -1.00) |  |  |
|  |  |  |  |  |  |  |  |  |  |  |  |

* The odds ratios (ORs) quantify the magnitude of the associations between the immunoglobulin isotype-antigen pair and COVID-19 in the 154 individuals, 20 with COVID-19 and 134 without the disease. An OR of 1.00 denotes the reference category.

T1 to T3: tertiles.

a Unless otherwise specified, Odds ratios of the isotype-antigen pair of the immunoglobulins were mutually adjusted for, and further adjusted by age, education and smoking (all confounders p<0.25).

b Wald’s test (two-tailed). c Odds ratios of the isotype-antigen pair of the immunoglobulins were mutually adjusted for, and further adjusted by education and smoking (both confounders p<0.25).

**Table 10.** Influence of mixtures of cytokines and immunoglobulins on

the risk of COVID-19 (N = 154)*

| **Model** | | **ORa** | **(95% CI)** | | **Pb** | **Model** | **ORa** | **(95% CI)** | | **Pb** |  |
| --- | --- | --- | --- | --- | --- | --- | --- | --- | --- | --- | --- |
| **1a** | **IL-8** |  |  |  |  | **1b** |  |  |  |  |  |
|  | T1+T2 | 1.00 |  |  | 0.009 |  | 1.00 |  |  | 0.015 |  |
|  | T3 | 0.06 | (0.01 | -0.49) |  |  | 0.07 | (0.01 | -0.59) |  |  |
|  |  |  |  |  |  |  |  |  |  |  |  |
|  | **MIP1-α** |  |  |  |  |  |  |  |  |  |  |
|  | T1+T2 | 1.00 |  |  | 0.035 |  | 1.00 |  |  | 0.033 |  |
|  | T3 | 3.67 | (1.09 | -12.34) |  |  | 4.01 | (1.12 | -14.35) |  |  |
|  |  |  |  |  |  |  |  |  |  |  |  |
|  | **TNF-α** |  |  |  |  |  |  |  |  |  |  |
|  | T1 | 1.00 |  |  | 0.033 |  | – |  |  |  |  |
|  | T2+T3 | 0.28 | (0.09 | -0.90) |  |  |  |  |  |  |  |
|  |  |  |  |  |  |  |  |  |  |  |  |
|  | **IL-2R** |  |  |  |  |  |  |  |  |  |  |
|  | T1 | – |  |  |  |  | 1.00 |  |  | 0.047 |  |
|  | T2+T3 |  |  |  |  |  | 0.28 | (0.08 | -0.99) |  |  |
|  |  |  |  |  |  |  |  |  |  |  |  |
|  | **IgA CMV pp150** |  |  |  |  |  |  |  |  |  |  |
|  | T1+T2 | 1.00 |  |  | 0.016 |  | – |  |  |  |  |
|  | T3 | 0.16 | (0.04 | -0.71) |  |  |  |  |  |  |  |
|  |  |  |  |  |  |  |  |  |  |  |  |
|  | **IgA N 229E** |  |  |  |  |  |  |  |  |  |  |
|  | T1 | – |  |  |  |  | 1.00 |  |  | 0.043 |  |
|  | T2+T3 |  |  |  |  |  | 0.29 | (0.09 | -0.96) |  |  |
|  |  |  |  |  |  |  |  |  |  |  |  |
| **2a** | **MIP-1α** |  |  |  |  | **2b** |  |  |  |  |  |
|  | T1+T2 | 1.00 |  |  | 0.009 |  | 1.00 |  |  | 0.017 |  |
|  | T3 | 5.78 | (1.56 | -21.45) |  |  | 5.07 | (1.34 | -19.21) |  |  |
|  |  |  |  |  |  |  |  |  |  |  |  |
|  | **IL-4** |  |  |  |  |  |  |  |  |  |  |
|  | Not quantified | 1.00 |  |  | 0.004 |  | – |  |  |  |  |
|  | Quantified | 0.07 | (0.01 | -0.45) |  |  |  |  |  |  |  |
|  |  |  |  |  |  |  |  |  |  |  |  |
|  | **IL-2R** |  |  |  |  |  |  |  |  |  |  |
|  | T1 | – |  |  |  |  | 1.00 |  |  | 0.008 |  |
|  | T2+T3 |  |  |  |  |  | 0.17 | (0.05 | -0.64) |  |  |
|  |  |  |  |  |  |  |  |  |  |  |  |
|  | **IgA N 229E** |  |  |  |  |  |  |  |  |  |  |
|  | T1 | 1.00 |  |  | 0.026 |  | 1.00 |  |  | 0.030 |  |
|  | T2+T3 | 0.26 | (0.08 | -0.85) |  |  | 0.28 | (0.09 | -0.88) |  |  |
|  |  |  |  |  |  |  |  |  |  |  |  |
|  | **IgG CMV pp150** |  |  |  |  |  |  |  |  |  |  |
|  | T1+T2 | 1.00 |  |  | 0.017 |  | 1.00 |  |  | 0.027 |  |
|  | T3 | 0.15 | (0.03 | -0.71) |  |  | 0.19 | (0.04 | -0.83) |  |  |
|  |  |  |  |  |  |  |  |  |  |  |  |
| **3a** | **IL-8** |  |  |  |  | **3b** |  |  |  |  |  |
|  | T1+T2 | 1.00 |  |  | 0.010 |  | 1.00 |  |  | 0.014 |  |
|  | T3 | 0.06 | (0.01 | -0.50) |  |  | 0.06 | (0.01 | -0.58) |  |  |
|  |  |  |  |  |  |  |  |  |  |  |  |
|  | **MIP-1α** |  |  |  |  |  |  |  |  |  |  |
|  | T1+T2 | 1.00 |  |  | 0.015 |  | 1.00 |  |  | 0.028 |  |
|  | T3 | 5.15 | (1.37 | -19.36) |  |  | 4.27 | (1.17 | -15.55) |  |  |
|  |  |  |  |  |  |  |  |  |  |  |  |
|  | **G-CSF** |  |  |  |  |  |  |  |  |  |  |
|  | T1 | 1.00 |  |  | 0.026 |  | 1.00 |  |  | 0.046 |  |
|  | T2+T3 | 0.22 | (0.06 | -0.83) |  |  | 0.26 | (0.07 | -0.98) |  |  |
|  |  |  |  |  |  |  |  |  |  |  |  |
|  | **IgA CMV pp150** |  |  |  |  |  |  |  |  |  |  |
|  | T1+T2 | 1.00 |  |  | 0.017 |  | – |  |  |  |  |
|  | T3 | 0.16 | (0.04 | -0.72) |  |  |  |  |  |  |  |
|  |  |  |  |  |  |  |  |  |  |  |  |
|  | **IgA N 229E** |  |  |  |  |  |  |  |  |  |  |
|  | T1 | – |  |  |  |  | 1.00 |  |  | 0.040 |  |
|  | T2+T3 |  |  |  |  |  | 0.29 | (0.09 | -0.95) |  |  |
|  |  |  |  |  |  |  |  |  |  |  |  |

[ continued ]

**Table 10.** Continued.

| **Model** | | **ORa** | **(95% CI)** | | **Pb** | **Model** | **ORa** | **(95% CI)** | | **Pb** |  |
| --- | --- | --- | --- | --- | --- | --- | --- | --- | --- | --- | --- |
| **4a** | **IL-8** |  |  |  |  | **4b** |  |  |  |  |  |
|  | T1+T2 | 1.00 |  |  | 0.015 |  | 1.00 |  |  | 0.015 |  |
|  | T3 | 0.07 | (0.01 | -0.60) |  |  | 0.07 | (0.01 | -0.59) |  |  |
|  |  |  |  |  |  |  |  |  |  |  |  |
|  | **MIP-1α** |  |  |  |  |  |  |  |  |  |  |
|  | T1+T2 | 1.00 |  |  | 0.023 |  | 1.00 |  |  | 0.032 |  |
|  | T3 | 4.50 | (1.23 | -16.46) |  |  | 3.68 | (1.12 | -12.12) |  |  |
|  |  |  |  |  |  |  |  |  |  |  |  |
|  | **TNF-α** |  |  |  |  |  |  |  |  |  |  |
|  | T1 | – |  |  |  |  | 1.00 |  |  | 0.016 |  |
|  | T2+T3 |  |  |  |  |  | 0.23 | (0.07 | -0.76) |  |  |
|  |  |  |  |  |  |  |  |  |  |  |  |
|  | **IL-2R** |  |  |  |  |  |  |  |  |  |  |
|  | T1 | 1.00 |  |  | 0.009 |  | – |  |  |  |  |
|  | T2+T3 | 0.18 | (0.05 | -0.66) |  |  |  |  |  |  |  |
|  |  |  |  |  |  |  |  |  |  |  |  |
|  | **IgG CMV pp150** |  |  |  |  |  |  |  |  |  |  |
|  | T1+T2 | 1.00 |  |  | 0.032 |  | – |  |  |  |  |
|  | T3 | 0.19 | (0.04 | -0.87) |  |  |  |  |  |  |  |
|  |  |  |  |  |  |  |  |  |  |  |  |
|  | **IgG EBV EA-D** |  |  |  |  |  |  |  |  |  |  |
|  | T1 | – |  |  |  |  | 1.00 |  |  | 0.015 |  |
|  | T2+T3 |  |  |  |  |  | 0.21 | (0.06 | -0.74) |  |  |
|  |  |  |  |  |  |  |  |  |  |  |  |
| **5a** | **IL-8** |  |  |  |  | **5b** |  |  |  |  |  |
|  | T1+T2 | 1.00 |  |  | 0.013 |  | – |  |  |  |  |
|  | T3 | 0.05 | (0.01 | -0.54) |  |  |  |  |  |  |  |
|  |  |  |  |  |  |  |  |  |  |  |  |
|  | **MIP-1α** |  |  |  |  |  |  |  |  |  |  |
|  | T1+T2 | 1.00 |  |  | 0.030 |  | 1.00 |  |  | 0.005 |  |
|  | T3 | 3.94 | (1.14 | -13.57) |  |  | 6.83 | (1.78 | -26.27) |  |  |
|  |  |  |  |  |  |  |  |  |  |  |  |
|  | **TNF-α** |  |  |  |  |  |  |  |  |  |  |
|  | T1 | 1.00 |  |  | 0.048 |  | 1.00 |  |  | 0.029 |  |
|  | T2+T3 | 0.29 | (0.08 | -0.99) |  |  | 0.27 | (0.08 | -0.87) |  |  |
|  |  |  |  |  |  |  |  |  |  |  |  |
|  | **IL-4** |  |  |  |  |  |  |  |  |  |  |
|  | Not quantified | – |  |  |  |  | 1.00 |  |  | 0.008 |  |
|  | Quantified |  |  |  |  |  | 0.08 | (0.01 | -0.52) |  |  |
|  |  |  |  |  |  |  |  |  |  |  |  |
|  | **IgA N 229E** |  |  |  |  |  |  |  |  |  |  |
|  | T1 | 1.00 |  |  | 0.037 |  | 1.00 |  |  | 0.046 |  |
|  | T2+T3 | 0.26 | (0.07 | -0.92) |  |  | 0.29 | (0.08 | -0.98) |  |  |
|  |  |  |  |  |  |  |  |  |  |  |  |
|  | **IgG EBV EA-D** |  |  |  |  |  |  |  |  |  |  |
|  | T1 | 1.00 |  |  | 0.018 |  | – |  |  |  |  |
|  | T2+T3 | 0.21 | (0.06 | -0.77) |  |  |  |  |  |  |  |
|  |  |  |  |  |  |  |  |  |  |  |  |
|  | **IgG CMV pp150** |  |  |  |  |  |  |  |  |  |  |
|  | T1+T2 | – |  |  |  |  | 1.00 |  |  | 0.025 |  |
|  | T3 |  |  |  |  |  | 0.16 | (0.03 | -0.80) |  |  |
|  |  |  |  |  |  |  |  |  |  |  |  |

[ continued ]

**Table 10.** Continued.

| **Model** | | **ORa** | **(95% CI)** | | **Pb** |
| --- | --- | --- | --- | --- | --- |
| **6** | **IL-8** |  |  |  |  |
|  | T1+T2 | 1.00 |  |  | 0.006 |
|  | T3 | 0.04 | (0.00 | -0.39) |  |
|  |  |  |  |  |  |
|  | **MIP-1α** |  |  |  |  |
|  | T1+T2 | 1.00 |  |  | 0.009 |
|  | T3 | 5.69 | (1.53 | -21.17) |  |
|  |  |  |  |  |  |
|  | **IL-5** |  |  |  |  |
|  | ≤Q3 | 1.00 |  |  | 0.019 |
|  | Q4 | 0.06 | (0.01 | -0.64) |  |
|  |  |  |  |  |  |
|  | **TNF-α** |  |  |  |  |
|  | T1 | 1.00 |  |  | 0.020 |
|  | T2+T3 | 0.22 | (0.06 | -0.79) |  |
|  |  |  |  |  |  |
|  | **IgG EBV EA-D** |  |  |  |  |
|  | T1 | 1.00 |  |  | 0.013 |
|  | T2+T3 | 0.18 | (0.05 | -0.70) |  |
|  |  |  |  |  |  |
| **7** | **RANTES** |  |  |  |  |
|  | T1 | 1.00 |  |  | 0.031 |
|  | T2+T3 | 0.27 | (0.08 | -0.89) |  |
|  |  |  |  |  |  |
|  | **IL-12** |  |  |  |  |
|  | T1 | 1.00 |  |  | 0.029 |
|  | T2+T3 | 5.06 | (1.18 | -21.69) |  |
|  |  |  |  |  |  |
|  | **IL-5** |  |  |  |  |
|  | ≤Q3 | 1.00 |  |  | 0.016 |
|  | Q4 | 0.07 | (0.01 | -0.60) |  |
|  |  |  |  |  |  |
|  | **IgG CMV pp150** |  |  |  |  |
|  | T1+T2 | 1.00 |  |  | 0.014 |
|  | T3 | 0.16 | (0.04 | -0.70) |  |
|  |  |  |  |  |  |
|  | **IgG EBV VCAp18** |  |  |  |  |
|  | T1 | 1.00 |  |  | 0.032 |
|  | T2+T3 | 0.28 | (0.09 | -0.90) |  |
|  |  |  |  |  |  |

* The odds ratios (ORs) quantify the magnitude of the associations between the immunoglobulin isotype-antigen pair and COVID-19 in the 154 individuals, 20 with COVID-19 and 134 without the disease. An OR of 1.00 denotes the reference category.

T1 to T3: tertiles.

a Odds ratios were always mutually adjusted for, and further adjusted by age, education and smoking (all confounders p<0.25).

b Wald’s test (two-tailed).
